# Supplementary material for: Potentiating Vγ9Vδ2 T cell proliferation and assessing their cytotoxicity towards adherent cancer cells at the single cell level
Source: PubMed Central journal article supplement (PMC8822357; doi:10.1242/bio.059049), 2022-02-07
Supplement: biolopen-11-059049-s1.pdf [file biolopen-11-059049-s1.pdf]

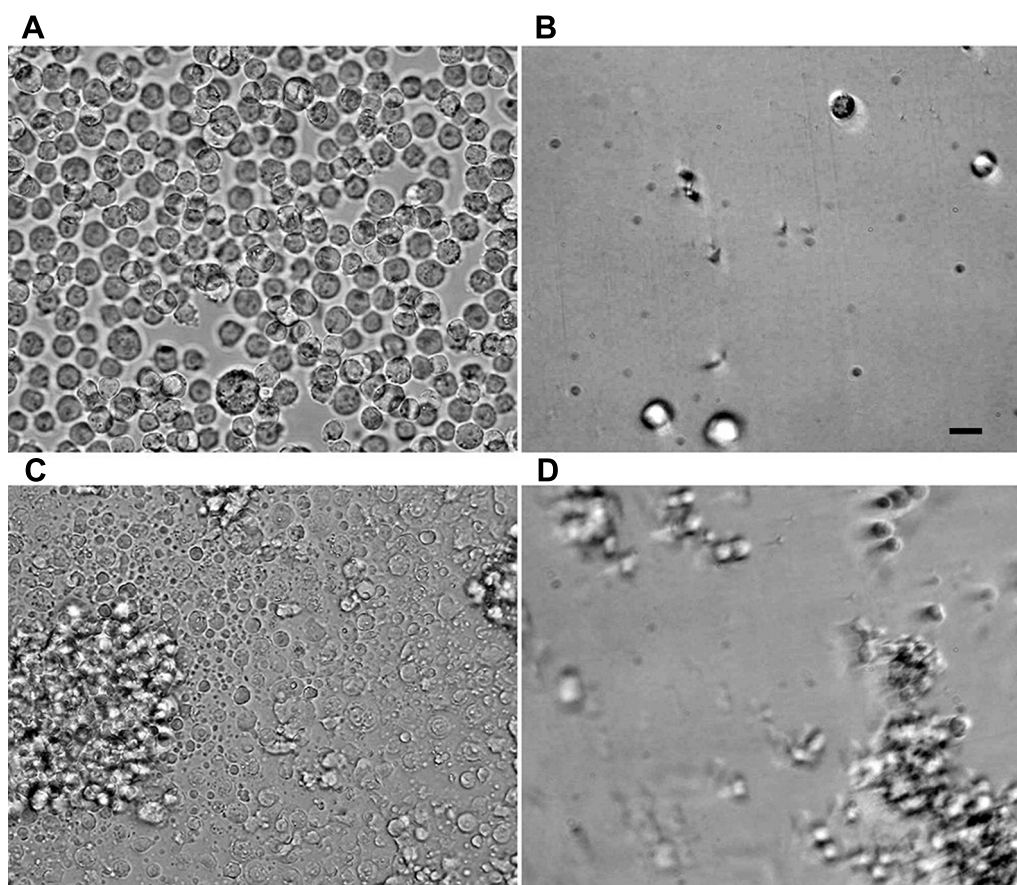

**Fig. S1. Neither effector nor target cells adhere to the plastic wells during the cytotoxicity assessment.** HT29 cells (A and B) or HT29 cells and *in vitro* expanded V $\gamma$ 9V $\delta$ 2 T cells (C and D) were incubated at 37°C in 96-well round bottom polystyrene plates at 5 % CO<sub>2</sub> after which the cells were imaged at the bottom of the wells using a 20X air objective. After 4h most of the HT29 cells were found at the bottom of well (A) as were  $\gamma\delta$  T cell colonies (C). After suspension with a 100  $\mu$ l automatic pipette, no cells adhered to the bottom of the wells (B and D). The images in the four panels have been individually contrast stretched. Scale bar 10  $\mu$ m.

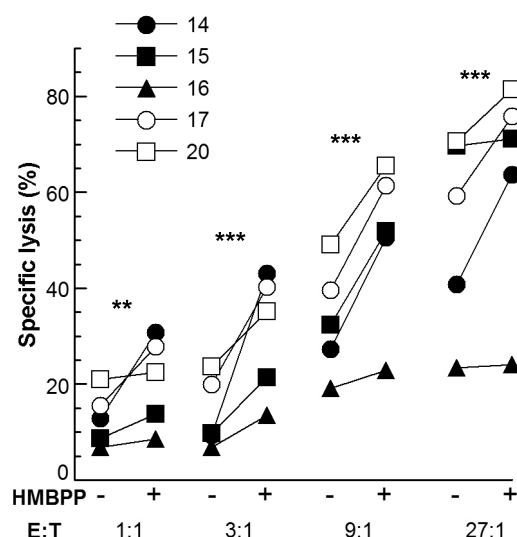

**Fig. S2. HMBPP enhances the cytotoxicity of *in vitro* expanded V $\gamma$ 9V $\delta$ 2 T cells towards SW620 cells at low E:T ratios.** PBMCs, freshly prepared or cryopreserved, were seeded at  $1 \times 10^6$  live cells/ml and stimulated with 80 pM HMBPP. IL-2 (25U/ml) was added days 3, 5, 7 and 9. Total  $\gamma\delta$  cells (effector cells=E) were purified by negative selection using magnetic beads after 11-12 days of culture. The purified effector cells (E) were incubated with SW620 target (T) cells  $\pm$  80 pM HMBPP at different E:T ratios for 4h at 37°C. Specific lysis was determined by flow cytometry analysis. Data shown are means from two biological replicates and stars indicate the statistical significance from an ANOVA for each E:T ratio.
